# Supplementary material
Source: Springer Nature journal article supplement (https://www.springermedizin.de/resource/supplementary/12958_2012_1011_MOESM3_ESM.pdf/9566590)

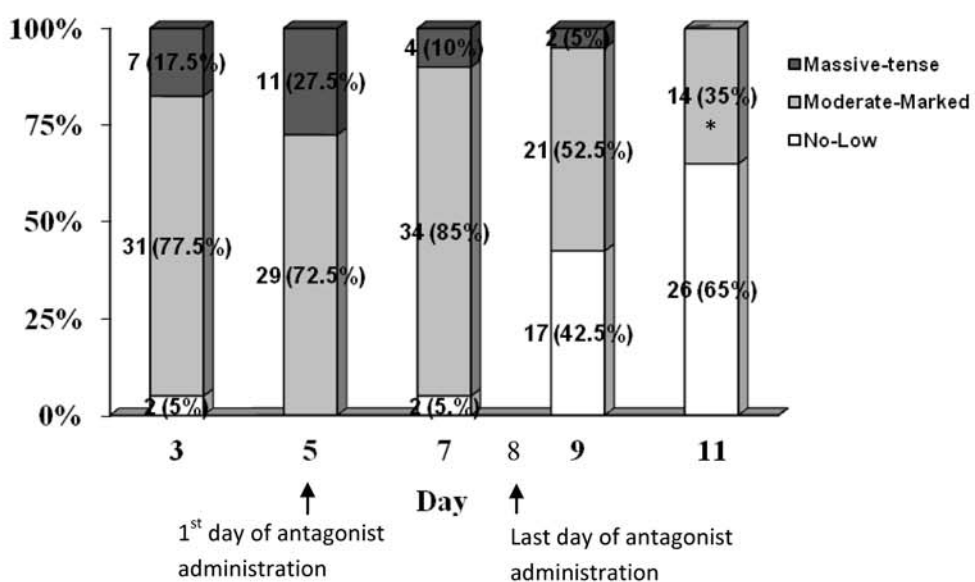

Supplement: MOESM3 [file 9566590]
